# Supplementary material for: Disruption of mitochondrial dynamics triggers muscle inflammation through interorganellar contacts and mitochondrial DNA mislocation
Source: PubMed Central journal article supplement (PMC9822926; doi:10.1038/s41467-022-35732-1), 2023-01-06
Supplement: 41467_2022_35732_MOESM1_ESM.pdf [file 41467_2022_35732_MOESM1_ESM.pdf]

# DISRUPTION OF MITOCHONDRIAL DYNAMICS TRIGGERS MUSCLE INFLAMMATION THROUGH INTERORGANELLAR CONTACTS AND MITOCHONDRIAL DNA MISLOCATION

## Supplementary figures and legends

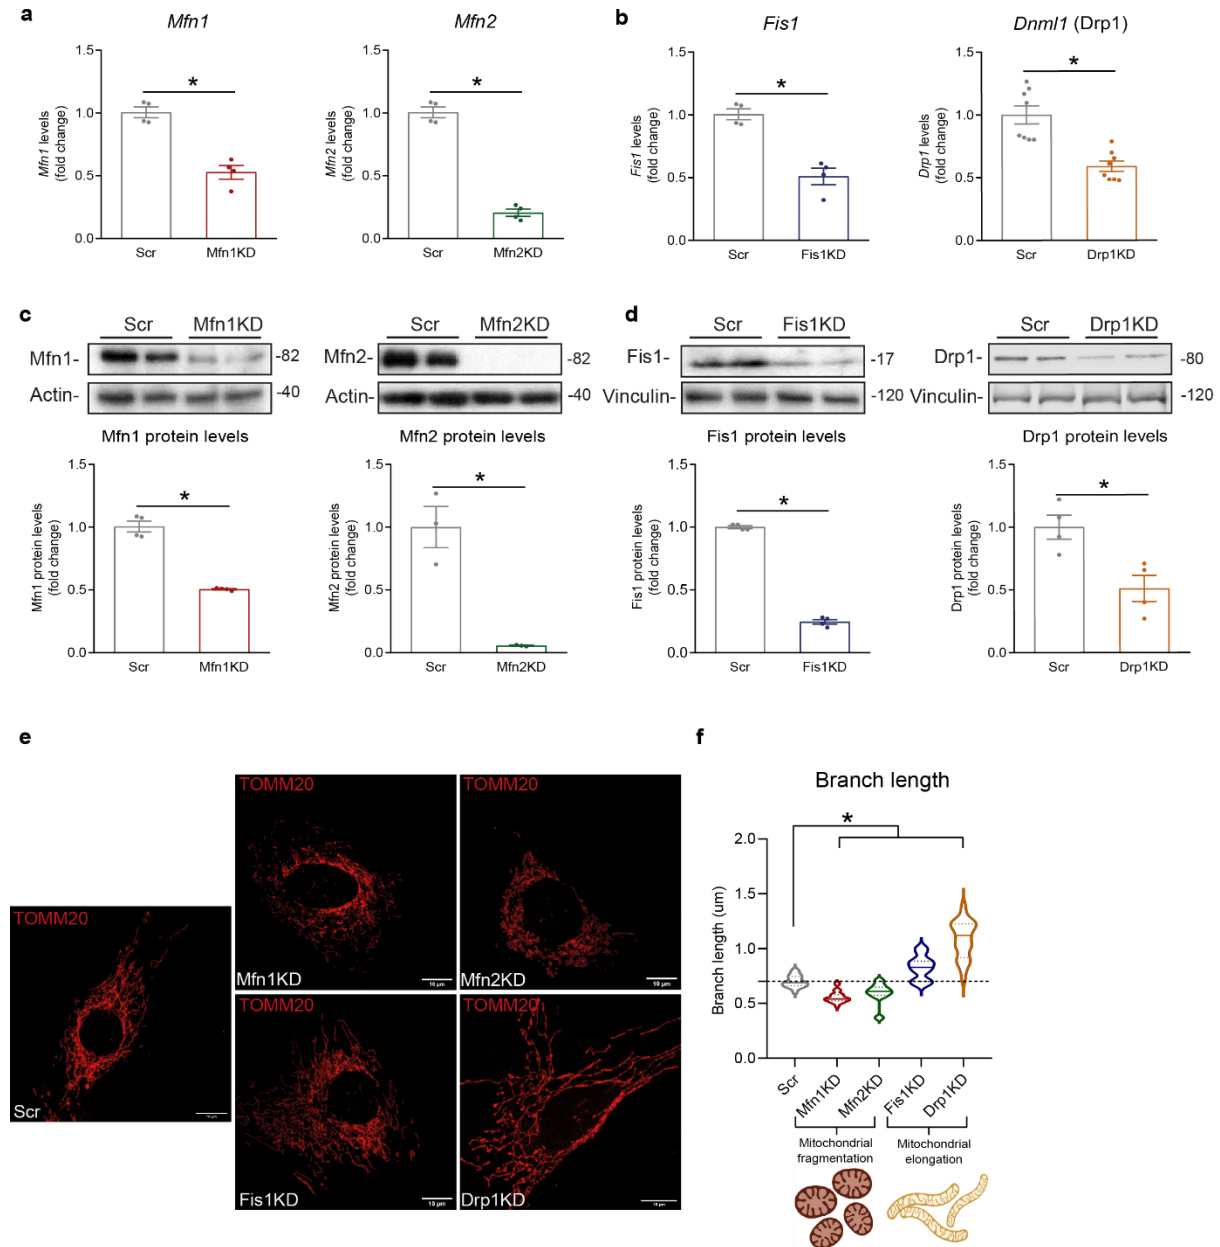

**Supplementary Fig. 1** (a) mRNA levels of *Mfn1* and *Mfn2* in *Mfn1*-deficient or *Mfn2*-deficient myoblasts, respectively (n=4). (b) mRNA levels of *Fis1* and *Drp1* in *Fis1*-deficient or *Drp1*-deficient myoblasts, respectively (n=4-8). (c) *Mfn1*, *Mfn2* and housekeeping (Actin) representative immunoblots in *Mfn1*-deficient or *Mfn2*-deficient myoblasts, respectively (n=3-4), and band quantifications. (d) *Fis1*, *Drp1* and housekeeping (Vinculin) in *Fis1*-deficient or *Drp1*-deficient myoblasts, respectively (n=4), and band quantifications. (e) Representative immunostainings targeting TOMM20 (red) in all cell lines (n=20 images per condition) (Scale bar 10  $\mu$ m). (f) Quantification of the branch length of the mitochondrial networks per cell line (n=20). (a - d) Two-sided Students' T-test, (f) One-Way ANOVA test and post-hoc t tests.

Data are expressed as mean of n independent experiments  $\pm$  SEM. \*p vs Scr <0.05. (f)  
Created with BioRender.com. (a - d and f) Source data is provided in the Source Data File.

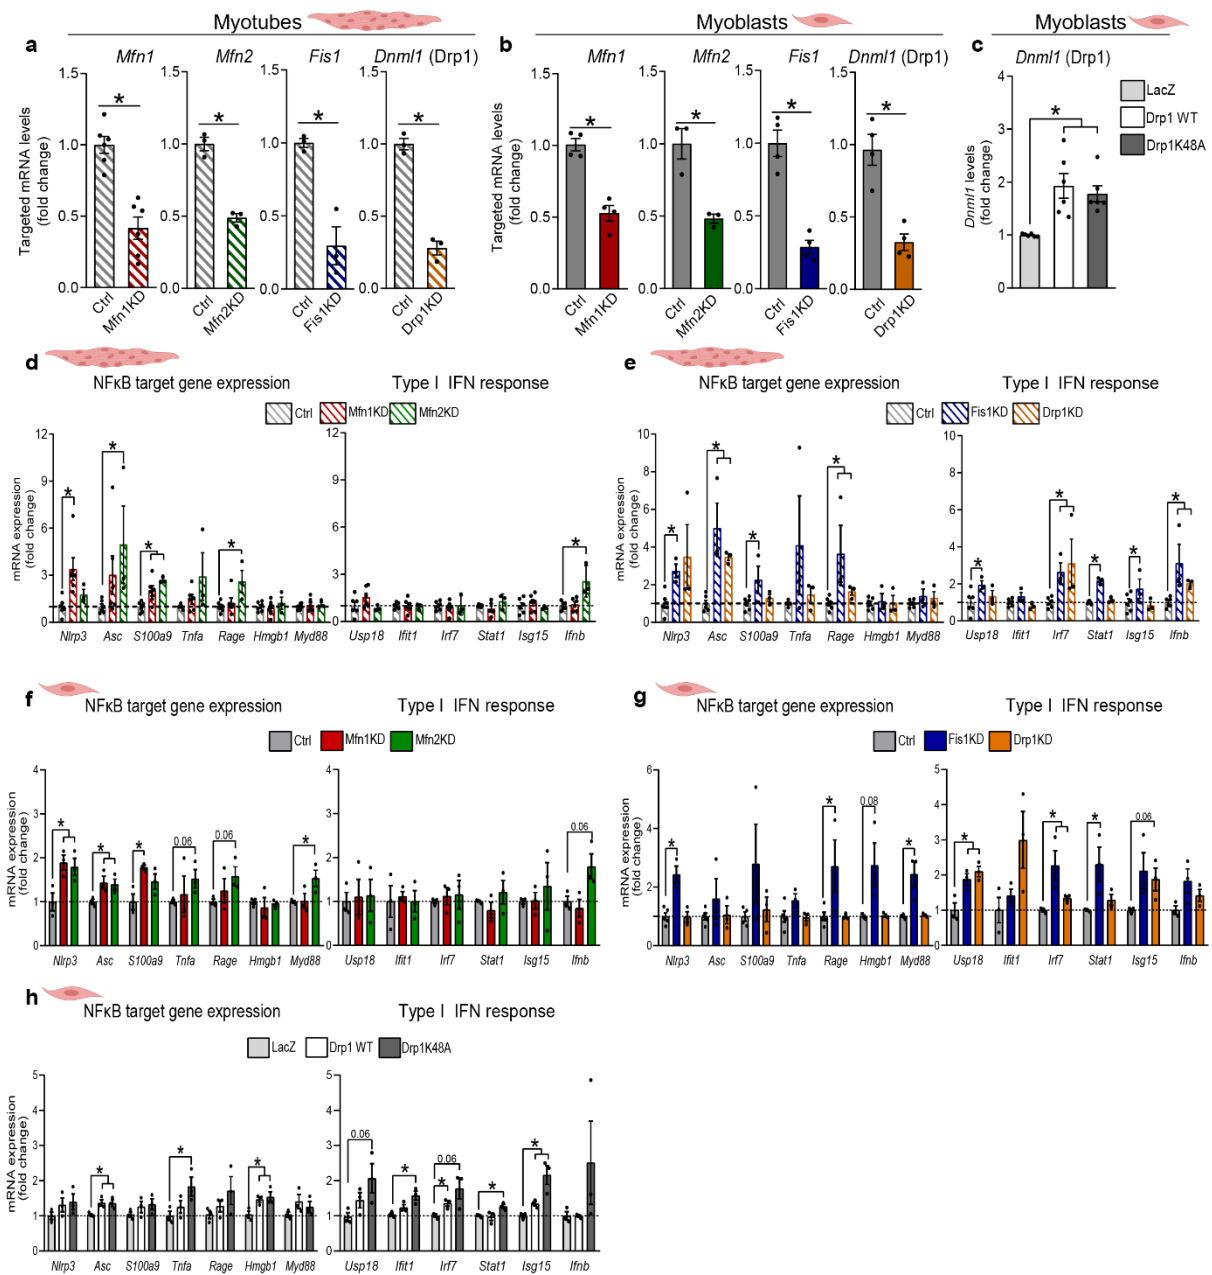

**Supplementary Fig. 2** (a) Validation of transient KD of mitochondrial dynamics proteins in (a) differentiated myotubes and (b) myoblasts (n=3-6). (c) Validation of Drp1 overexpression in myoblasts (n=6). Inflammatory profile in (d) Ctrl, Mfn1KD and Mfn2KD myotubes or (e) Ctrl, Drp1KD and Fis1KD myotubes (n=3-6). Inflammatory profile in myoblasts transfected with (f) siCtrl, siMfn1 and siMfn2, or (g) siCtrl, siFis1 and siDrp1 (n=3). (h) Inflammatory profile in myoblasts transduced with overexpression vectors of LacZ, wildtype Drp1 and negative dominant form of Drp1 (K48ADrp1) (n=3). (a, b, d - h) Two-sided Students' T-test, per gene in d - h, (c) One-way ANOVA test. Data are expressed as mean of n independent experiments  $\pm$  SEM. \*p vs Ctrl/LacZ <0.05. (a - h) Created with BioRender.com. (a - h) Source data is provided in the Source Data File.

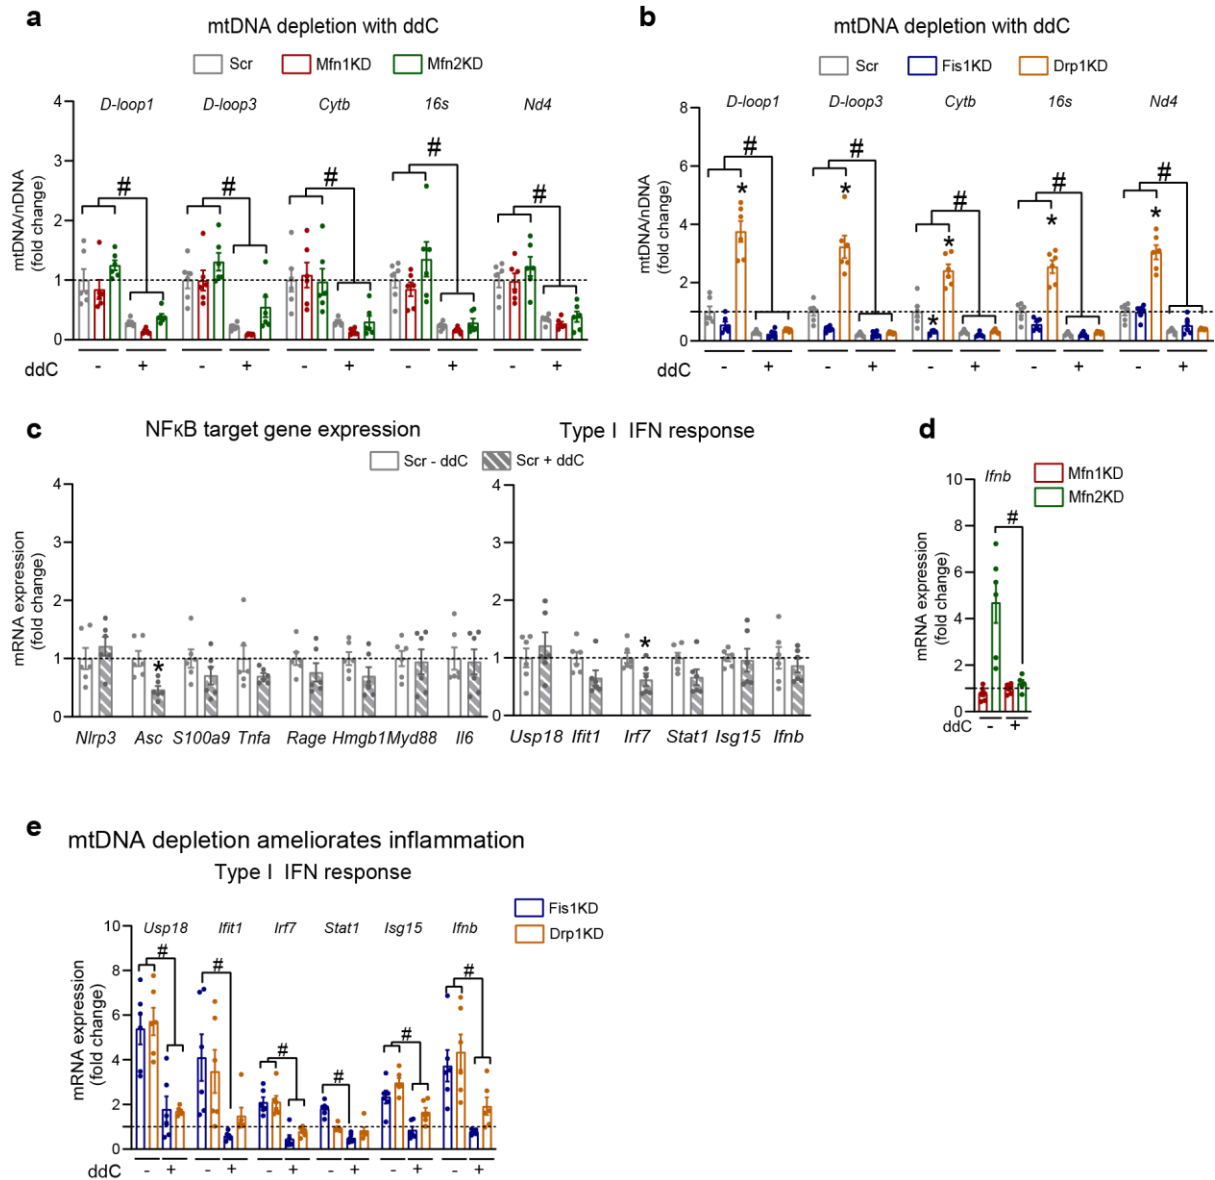

**Supplementary Fig. 3.** mtDNA abundance upon ddC treatment (40uM, 72h) in (a) Scr, Mfn1 or Mfn2-deficient myoblasts or (b) Scr, Fis1 or Drp1-deficient myoblasts (n=6). (c) Inflammatory profile of Scr myoblasts treated with ddC (n=6). (d) *Ifnb* expression in Mfn1 or Mfn2KD myoblast upon ddC treatment (n=6). (e) Type I IFN response in Fis1- and Drp1KD myoblasts upon ddC treatment. (a - e) Two-sided Students' T-test per gene. Data are expressed as mean of n independent experiments  $\pm$  SEM. \*p vs Scr - ddC <0.05 in and #p vs. cognate KD - ddC <0.05. (a - e) Source data is provided in the Source Data File.

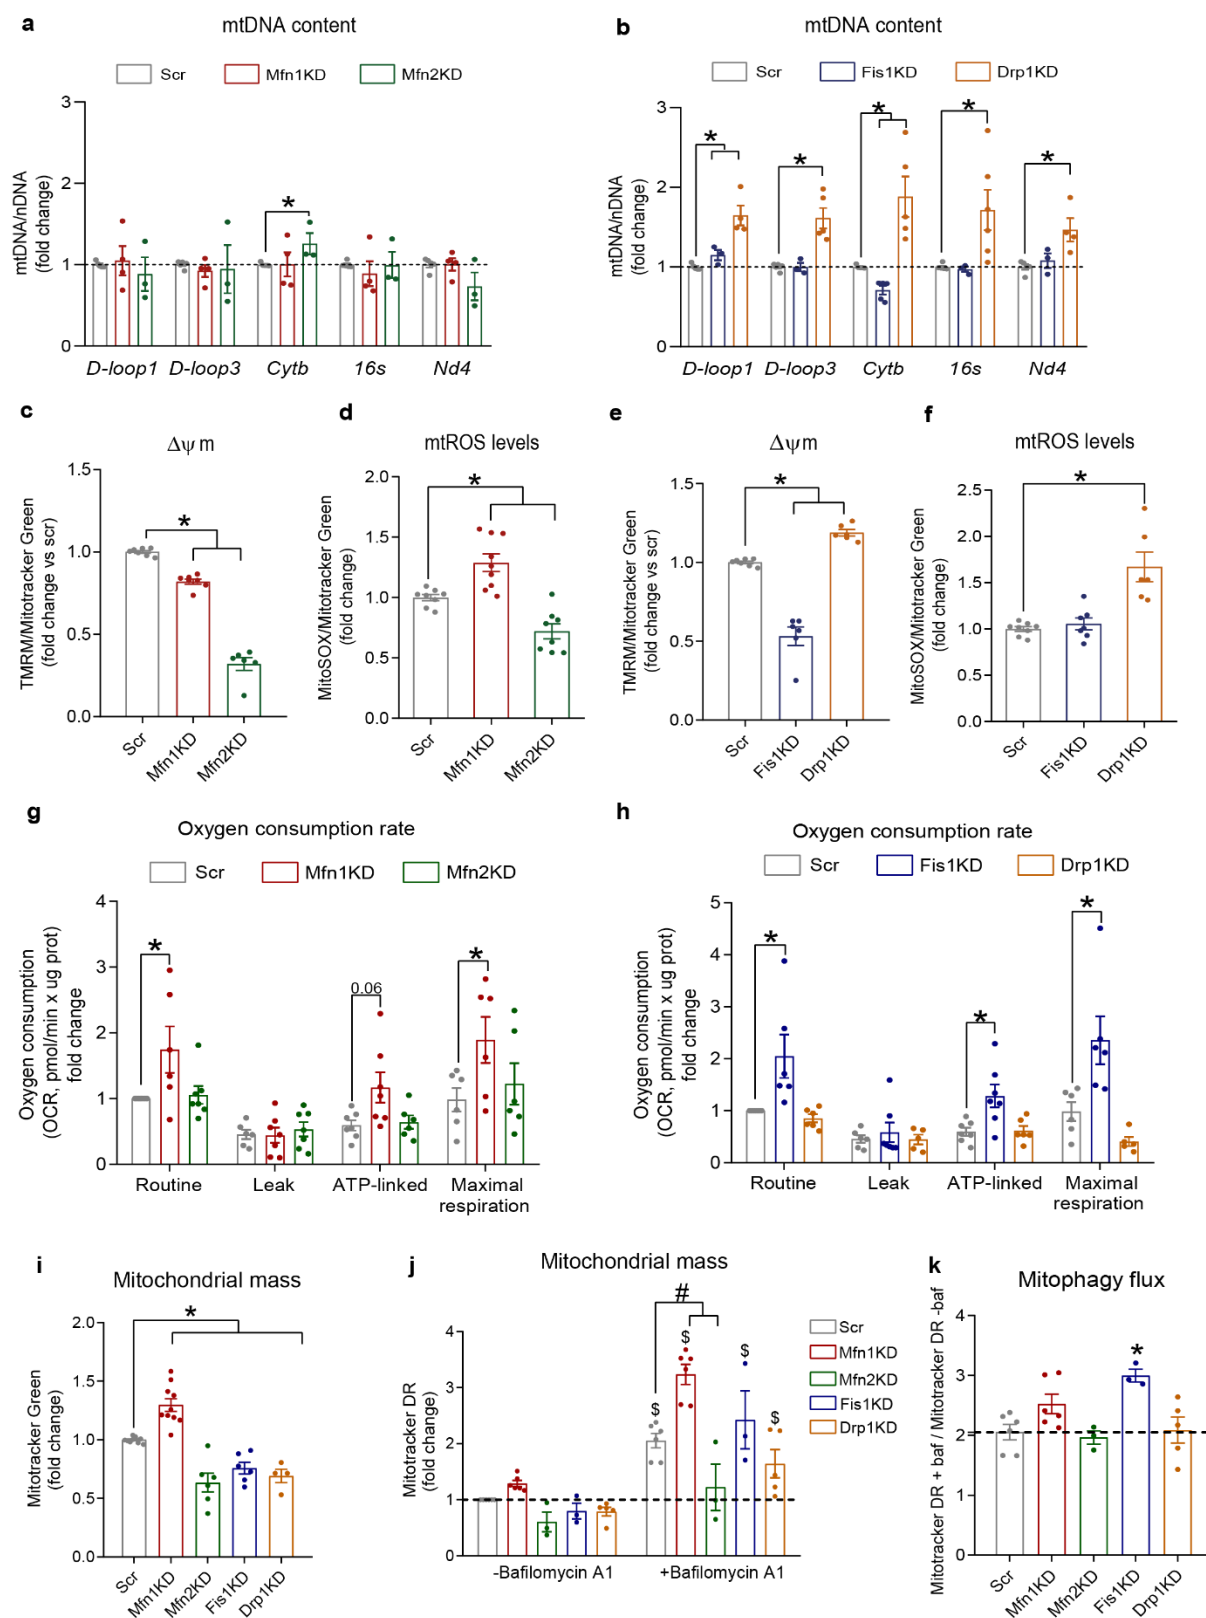

**Supplementary Fig. 4.** mtDNA abundance in (a) Scr, Mfn1 or Mfn2-deficient myoblasts (n=3-4) or (b) Scr, Fis1 or Drp1-deficient myoblasts (n=3-4). (c) TMRM relative to Mitotracker Green in Scr, Mfn1 or Mfn2-deficient myoblasts (n=6). (d) MitoSOX relative to Mitotracker Green in Scr, Mfn1 or Mfn2-deficient myoblasts (n=8). (e) TMRM relative to Mitotracker Green in Scr, Fis1 or Drp1-deficient myoblasts (n=5-6). (f) MitoSOX relative to Mitotracker Green in Scr,

Fis1 or Drp1-deficient myoblasts (n=6-7). Oxygen consumption rates in **(g)** Scr, Mfn1 or Mfn2-deficient myoblasts (n=6-7) or **(h)** Scr, Fis1 or Drp1-deficient myoblasts (n=5-7). **(i)** Mitotracker Green values in all cell lines. **(j)** Mitotracker Deep Red values in all cell lines with or without Bafilomycin A1 (200nM, 16h) and ratio of the signal with vs without Bafilomycin A1 as a measure of the mitophagic flux. **(a, b)** Two-sided Students' T-test per gene. **(c – f, i, k)** One-way ANOVA test and post-hoc t tests, **(g, h, j)** Two-way ANOVA test and post-hoc t tests. Data are expressed as mean of n independent experiments  $\pm$  SEM. \*p vs Scr <0.05 in **(a – i, k)**; \*p vs Scr - Bafilomycin A1 <0.05, # \$p vs Scr + Bafilomycin A1 <0.05, vs Scr/cognate KD – Bafilomycin A1 <0.05 in **(j)**. Source data is provided in the Source Data File.

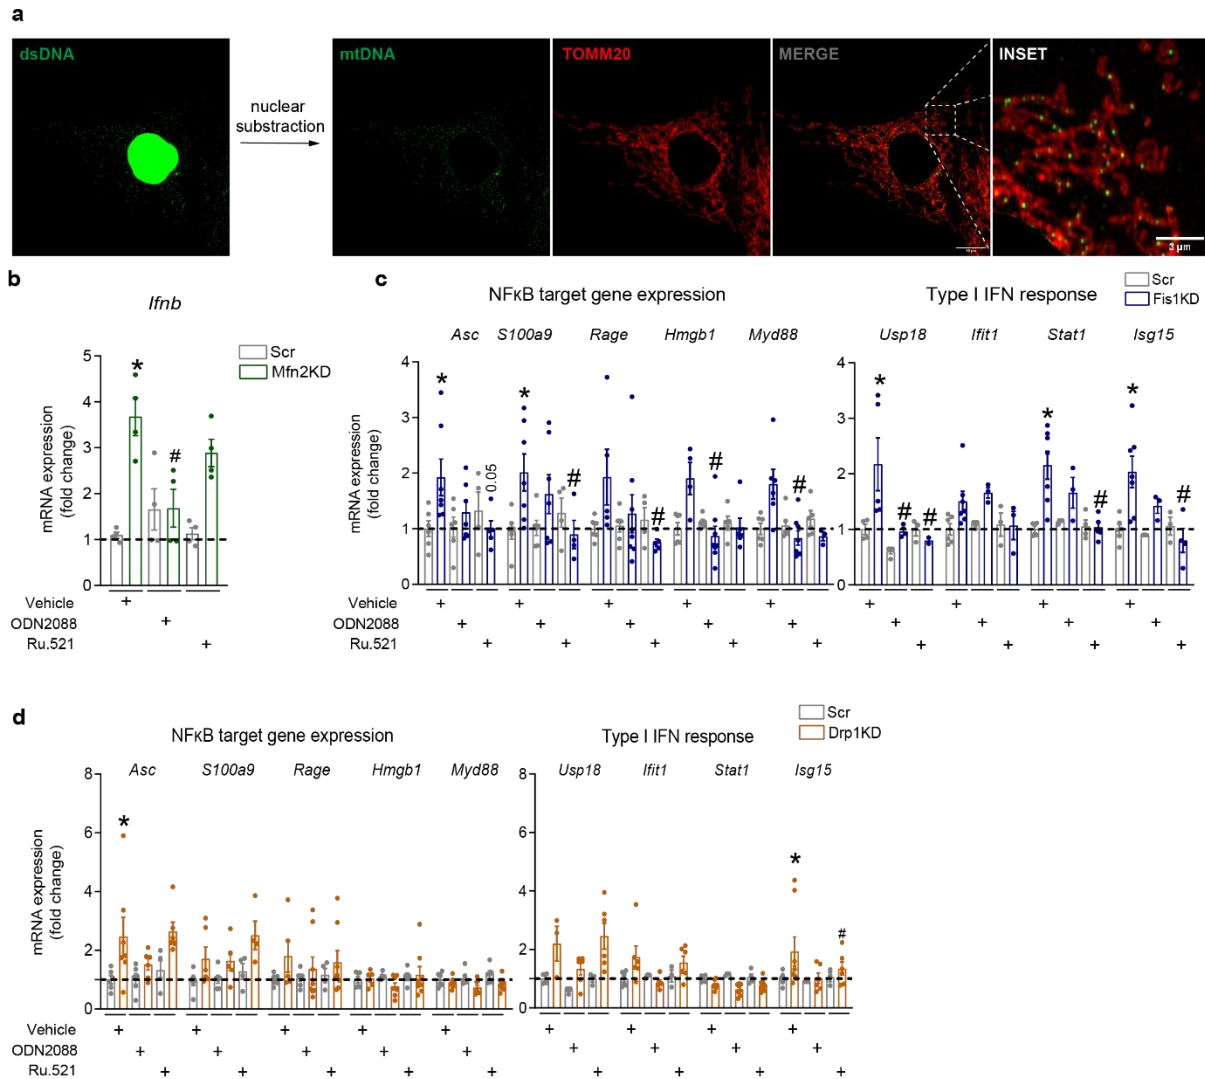

**Supplementary Fig. 5** (a) Representative immunostaining of dsDNA (green) with nuclear subtraction (mtDNA) and TOMM20 (red) in a Scr myoblast. (b) *Ifnb* mRNA levels upon ODN2088 or Ru.521 (1μM, 24h) treatment in Scr and Mfn2-myoblasts (n=4). NFκB target gene and type I IFN response gene levels upon ODN2088 or Ru.521 treatment in (c) Scr and Fis1-deficient myoblasts, and (d) Scr and Drp1-deficient myoblasts (n=3-7). (b) One-Way ANOVA test, (c, d) Two-way ANOVA test and post-hoc t tests. Data are expressed as mean of n independent experiments ± SEM. \*p vs Scr + vehicle <0.05 and #p vs. cognate KD + vehicle <0.05 in (b - d). (b - d) Source data is provided in the Source Data File.

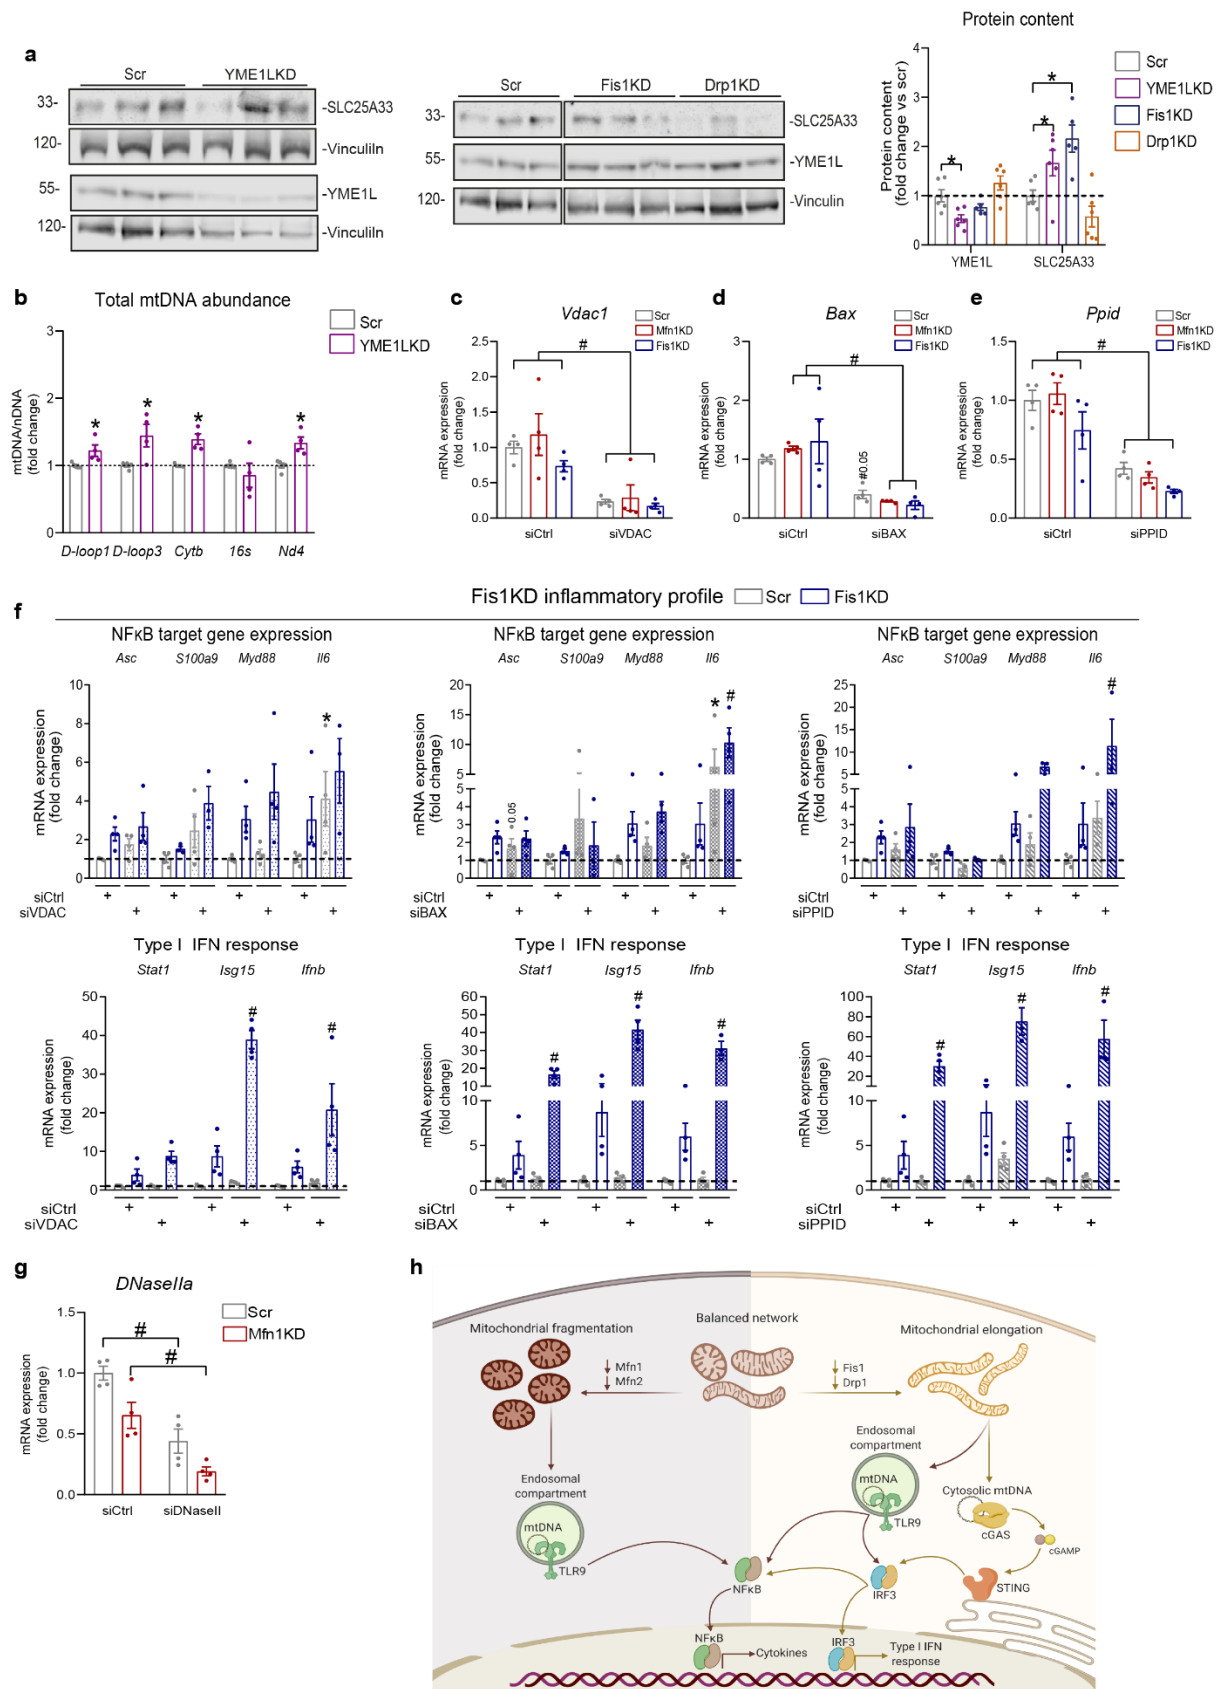

**Supplementary Fig. 6 (a)** SLC25A33, YME1L and Vinculin representative immunoblots and band quantification of SLC25A33 and YME1L in myoblasts deficient of YME1L, FIS1 or DRP1



compared to Scr. **(b)** mtDNA abundance in YME1L-deficient myoblast (n=4) mRNA of **(c)** *Vdac1*, **(d)** *Bax*, and **(e)** *Ppid* upon siCtrl, siVDAC, siBAX and siPPID transfection, respectively, in Scr, Mfn1 or Fis1-depleted myoblasts (n=4). **(f)** Inflammatory profile upon *Vdac1*, *Bax* or *Ppid* acute downregulation in Scr and Fis1KD myoblasts (n=4). **(g)** *DNaseIIa* mRNA levels upon siDNaseII tranfection in Scr and Mfn1-deficient myoblasts (n=4). **(h)** Graphical abstract showing the molecular mechanisms described coupling opposite mitochondrial morphologies and the trigger of intracellular inflammatory responses. **(a)** One-way ANOVA test, **(b)** Two-sided Students' T-test per gene, **(c - g)** Two-way ANOVA test and post-hoc t tests. Data are expressed as mean of n independent experiments  $\pm$  SEM. \*p vs Scr <0.05 in **(a, b)**, \*p vs Scr + siCtrl <0.05 and #p vs Scr/cognate KD + siCtrl <0.05 in **(c - g)**. **(h)** Created with BioRender.com. **(a - g)** Source data is provided in the Source Data File.

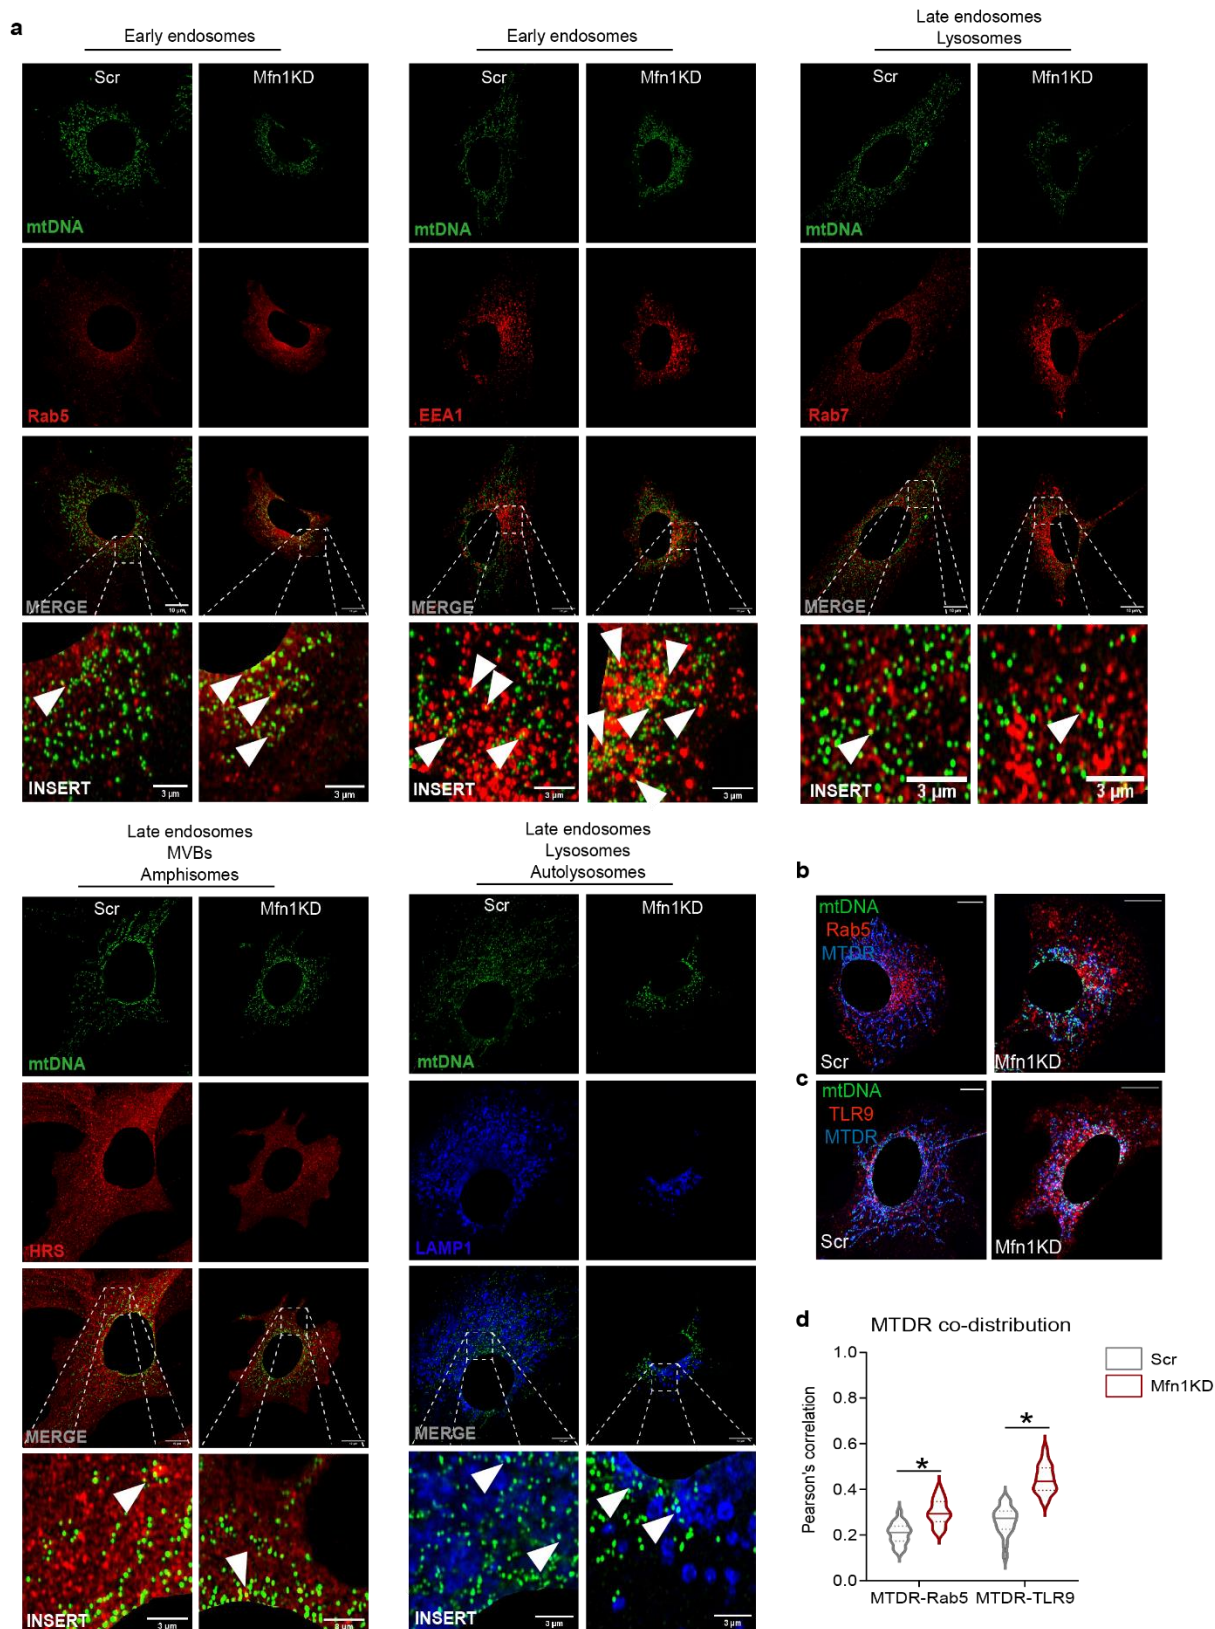

**Supplementary Fig. 7.** (a) Representative immunostainings of dsDNA (green) with subtraction of the nuclear signal (mtDNA), with endosomal markers Rab5, EEA1, Rab7, HRS (red) or LAMP1 (blue) in Scr and Mfn1-deficient myoblasts (Scale bar 10  $\mu$ m in MERGE and 3  $\mu$ m in INSET) (n=20 images per condition). (b) Quantification of the Pearson's correlation

between Mitotracker Deep Red (MTDR) and Rab5 or TLR9 in Scr and Mfn1-myoblasts (n=20) from **(c)** and **(d)** images used for 3D reconstructions (Scale bar 10  $\mu$ m). **(d)** Two-sided Students' T-test. Data are expressed as mean  $\pm$  SEM. \*p vs Scr <0.05. **(d)** Source data is provided in the Source Data File.

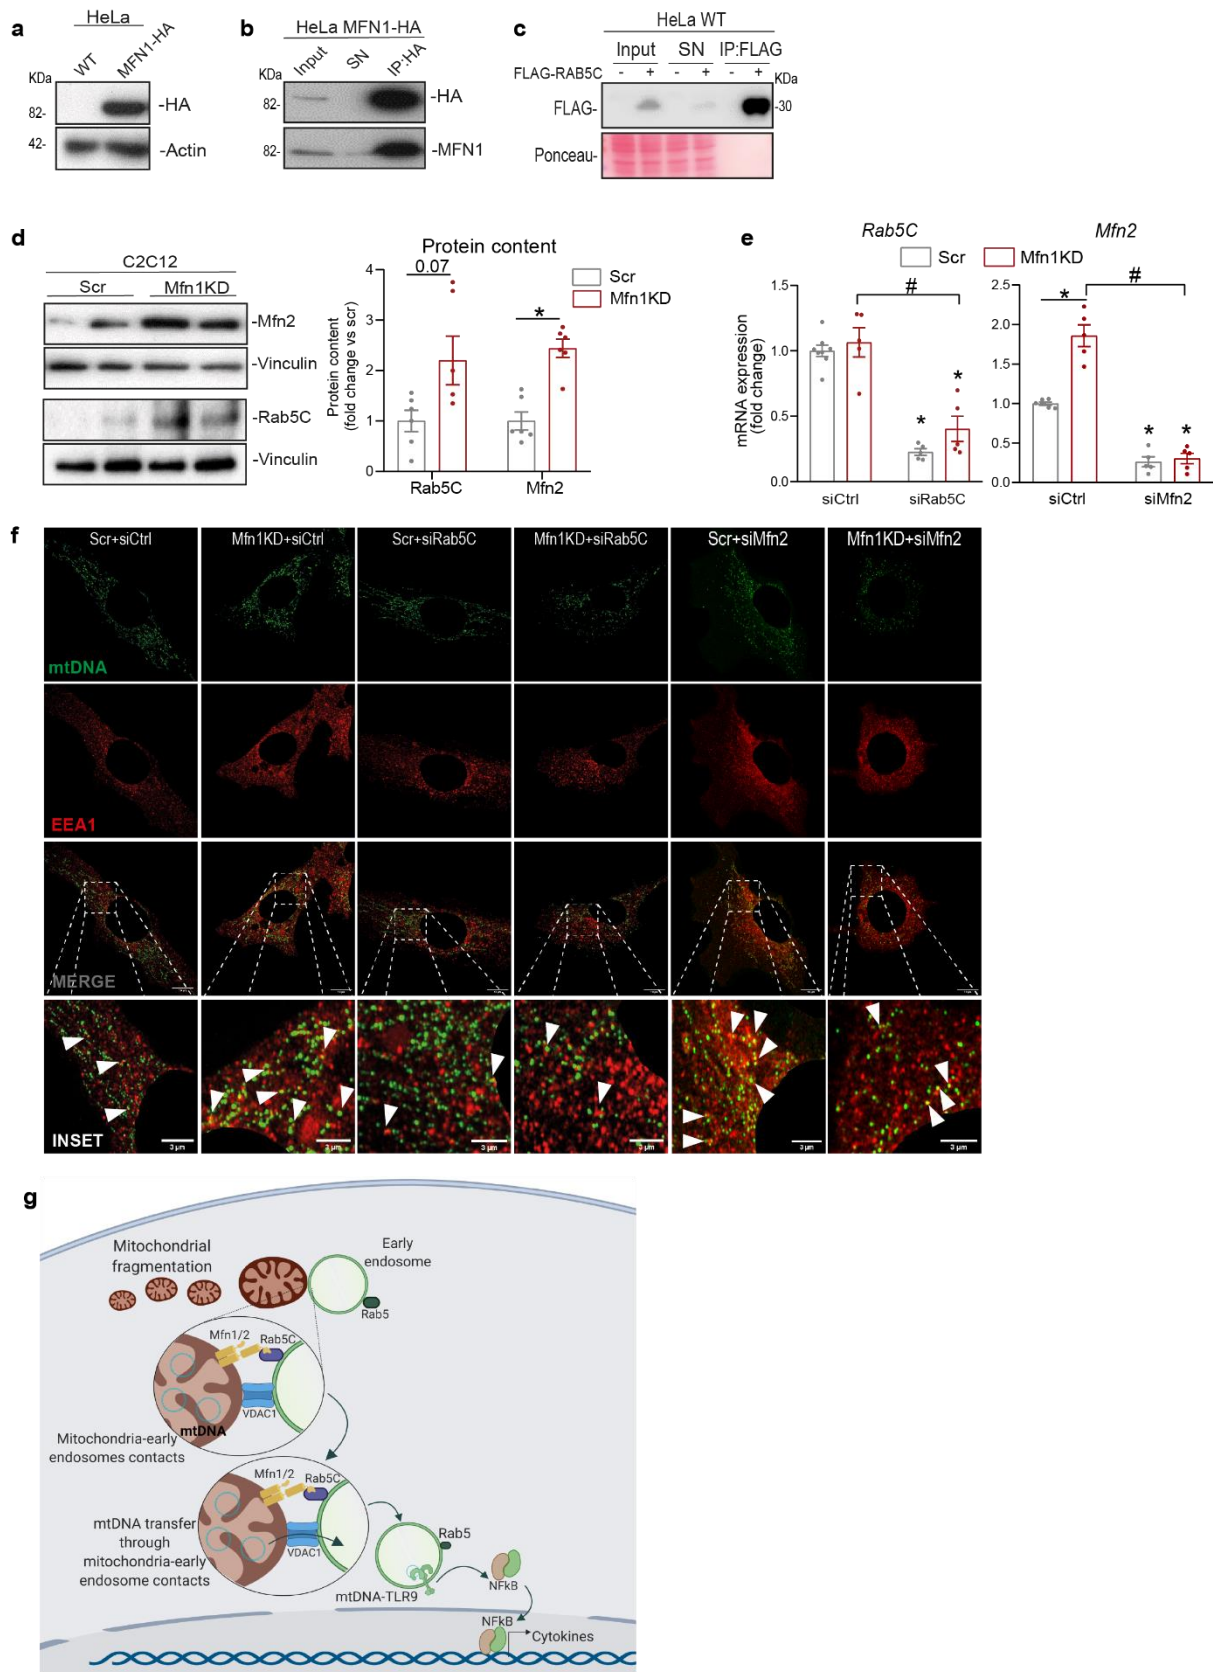

**Supplementary Fig. 8** (a) HA and actin representative immunoblot to validate the HA-tag incorporation in HeLa cells (n=3). (b) HA and MFN1 representative immunoblot of the immunoprecipitation in HeLa MFN1-HA cells (n=3). (c) FLAG representative immunoblot and

Ponceau staining in input, supernatant (SN) and eluate (IP) fractions of FLAG-immunoprecipitation in HeLa WT cells with or without transfection of the FLAG-RAB5C vector (n=3) (SN, supernatant). **(d)** Mfn2 and Rab5C representative immunoblot and band quantification in Scr and Mfn1-deficient myoblasts (n=6). **(e)** *Rab5C* and *Mfn2* mRNA levels upon transfection of siCtrl and siRab5C or siMfn2, respectively, in Scr or Mfn1-myoblasts (n=5-7). **(f)** Representative immunostainings of dsDNA (green) with nuclear subtraction of the signal (mtDNA) and EEA1 (red) in Scr and Mfn1-myoblasts upon siCtrl, siRab5C or siMfn2 transfection (Scale bar 10  $\mu$ m in MERGE and 3  $\mu$ m in INSET) (n=20 images per condition). Arrows point positive co-distribution. **(g)** Proposed working model for the mechanism described. **(d)** Two-sided Students' T-test, **(e)** Two-way ANOVA test and post-hoc t tests. Data are expressed as mean of n independent experiments  $\pm$  SEM. \*p vs Scr <0.05 in **(e)**. \*p vs Scr + siCtrl <0.05 and #p vs Mfn1KD + siCtrl <0.05 in **(e)**. **(g)** Created with BioRender.com. **(a - e)** Source data is provided in the Source Data File.

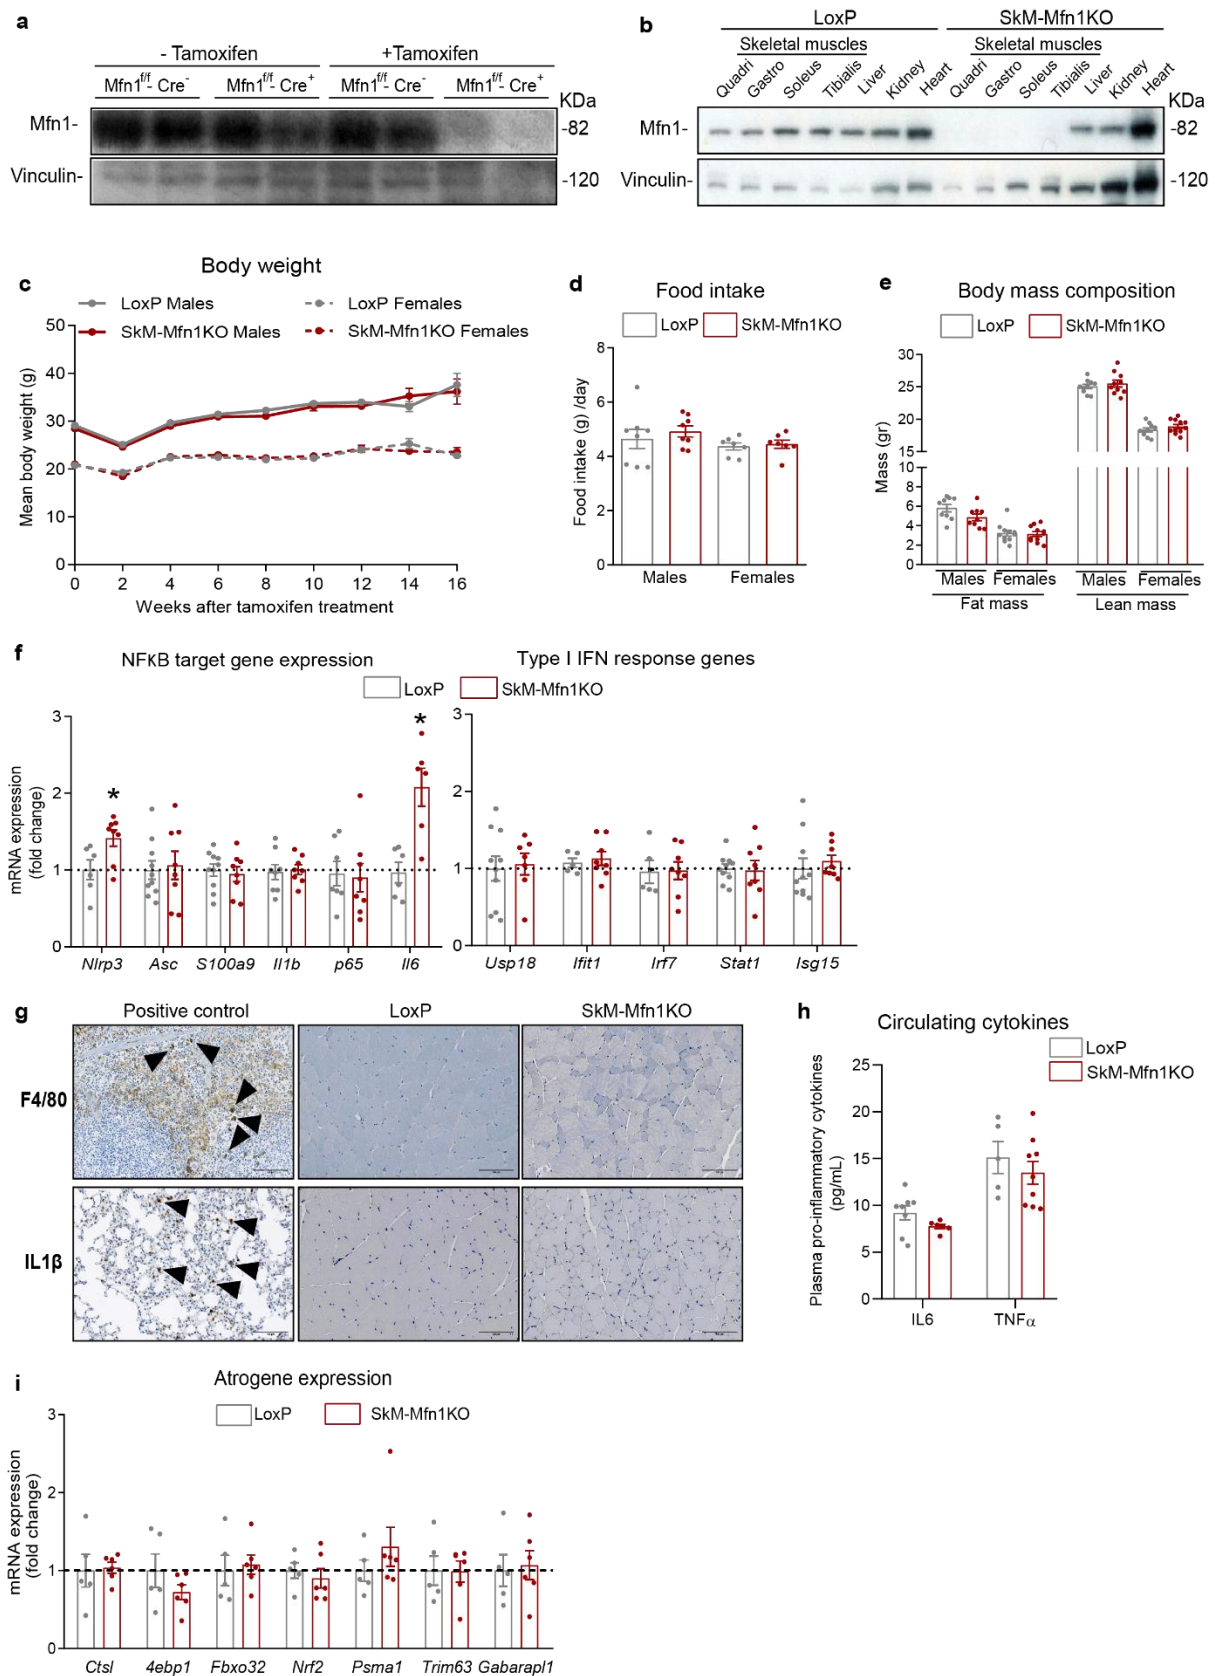

**Supplementary Fig. 9** (a) Mfn1 and vinculin representative immunoblot of quadriceps muscles of Cre<sup>+</sup> or Cre<sup>-</sup> animals with or without tamoxifen treatment (n=4). (b) Mfn1 and vinculin representative immunoblot in different tissues of LoxP and SkM-Mfn1KO mice (n=3).

(c) Body weight monitorization in male and female LoxP and SkM-Mfn1KO mice (n=20). (d) Food intake in male LoxP and SkM-Mfn1KO mice (n=8). (e) Body mass composition in male and female LoxP and SkM-Mfn1KO mice (n=9). (f) NFκB target and type I IFN response gene expression levels in quadriceps muscles of LoxP (n=6-9) and SkM-Mfn1KO female mice (n=6-10). (g) Representative immunohistochemistry (IHC) against F4/80 and IL1β in cross-sectional sections of gastrocnemius muscles of LoxP and SkM-Mfn1KO male mice (n=4). Black arrow point positive staining. Positive control in F4/80 IHC is an inflamed pancreas and in IL1β IHC is an inflamed lung. (h) Plasma levels of pro-inflammatory cytokines in LoxP (n=5-8) and SkM-Mfn1KO male mice (n=6-9). (i) Atroгене expression levels in quadriceps muscles of male LoxP (n=5) and SkM-Mfn1KO mice (n=5-6). (c, e, f) Two-way ANOVA test and post-hoc t tests, (d, h) Two-sided Students' T-test, (f, i) Two-sided Students' T-test per gene. Data are expressed as mean ± SEM. \*p vs LoxP <0.05 in (f). (a – f, h and i) Source data is provided in the Source Data File.





## Supplementary tables

### Supplementary Table 1. Primary antibodies.

| Antibody          | Catalog no.                         | Application | Dilution      |
|-------------------|-------------------------------------|-------------|---------------|
| $\alpha$ -Tubulin | T5168 (Sigma-Aldrich)               | WB          | 1:8000        |
| $\beta$ -Actin    | A1978 (Sigma-Aldrich)               | WB          | 1:5000        |
| anti-Vinculin     | Ab18058 (Abcam)                     | WB          | 1:5000        |
| anti-Mfn1         | SC-50330 (SantaCruz Biotechnology)  | WB          | 1:500         |
| anti-Mfn1         | Kindly provided by Dr. Carles Cantó | WB          | 1:1000        |
| anti-Mfn2         | 11925 (Cell Signaling)              | WB          | 1:1000        |
| anti-Drp1         | 611112 (BD transduction Lab)        | WB          | 1:500         |
| anti-Fis1         | GTX111010 (GeneTex)                 | WB          | 1:1000        |
| anti-LAMP1        | SC-19992 (SantaCruz Biotechnology)  | WB, IF      | 1:1000, 1:400 |
| anti-TIMM23       | SC-514463 (SantaCruz Biotechnology) | WB          | 1:1000        |
| anti-YME1L        | 11510-1-AP (Protein Tech Group)     | WB          | 1:500         |
| anti-SLC25A33     | TA309042 (Origene)                  | WB          | 1:500         |
| anti-Rab5C        | NBP1-80858 (Novus)                  | WB          | 1:1000        |
| anti-FLAG         | 14793S (Cell Signaling)             | WB          | 1:500         |
| Anti-HA           | 3724S (Cell Signaling)              | WB          | 1:1000        |
| anti-F4/80        | 14-4801-85 (Clone BM, eBioscience)  | IHC         | 1:100         |
| anti-IL1 $\beta$  | Ab9722 (Abcam)                      | IHC         | 1:1000        |
| anti-TOMM20       | SC-17764 (SantaCruz Biotechnology)  | IF          | 1:400         |
| anti-TLR9         | SC-52966 (SantaCruz Biotechnology)  | IF          | 1:400         |
| anti-cGAS         | SC-515777 (SantaCruz Biotechnology) | IF          | 1:400         |
| anti-dsDNA        | Ab27156 (Abcam)                     | IF          | 1:400         |
| Anti-Rab5         | 1673547S (Cell Signaling)           | IF, IG      | 1:400, 1:4    |
| Anti-EEA1         | 3288S (Cell Signaling)              | IF          | 1:400         |
| Anti-Rab7         | 9367 (Cell Signaling)               | IF          | 1:400         |
| Anti-HRS          | 15087 (Cell Signaling)              | IF          | 1:400         |
| Anti-SdhA         | 459200 (Life Technologies)          | IG          | 1:20          |

### Supplementary Table 2. pLKO.1 plasmids.

| Targeted gene       | Target sequence       |
|---------------------|-----------------------|
| <i>Mfn1</i>         | CCCAGTGTACTGAAAGTGTAT |
| <i>Mfn2</i>         | CAAGACTACAAGCTGCGAATT |
| <i>Fis1</i>         | CCTGATTGATAAGGCCATGAA |
| <i>Dnml1</i> (Drp1) | CGGTGGTGCTAGGATTTGTTA |
| <i>Yme1L</i>        | CGAGCCAAACATATCTTGAAA |

### Supplementary Table 3. MISSION® siRNAs.

| Targeted gene       | MISSION® siRNA reference |
|---------------------|--------------------------|
| <i>Mfn1</i>         | SASI_Mm01_00037358       |
| <i>Mfn2</i>         | SASI_Mm01_00027321       |
| <i>Fis1</i>         | SASI_Mm01_00022625       |
| <i>Dnml1</i> (Drp1) | SASI_Mm01_00125378       |
| <i>Rab5C</i>        | SASI_Mm01_00105011       |
| <i>Vdac1</i>        | SASI_Mm02_00321251       |
| <i>Bax</i>          | SASI_Mm02_00311843       |
| <i>Ppid</i>         | SASI_Mm01_00039330       |
| <i>Dnasella</i>     | SASI_Mm01_00135573       |

**Supplementary Table 4. Primers targeting mtDNA-encoded sequences.**

| Gene           | Forward                   | Reverse                  |
|----------------|---------------------------|--------------------------|
| <i>D-loop1</i> | AATCTACCATCCTCCGTGAAACC   | TCAGTTTAGCTACCCCAAGTTTAA |
| <i>D-loop3</i> | TCCTCCGTGAAACCAACAA       | AGCGAGAAGAGGGGCATT       |
| <i>Cytb</i>    | GCTTTCCACTTCATCTTACCATTTA | TGTTGGGTTGTTTGATCCTG     |
| <i>Cox2</i>    | GGAACACTCCAAAAACAGACCT    | CCACCACTGGGTATTGAGTAGAA  |
| <i>16s</i>     | CACTGCCTGCCAGTGA          | ATACCGCGGCCGTTAAA        |
| <i>Nd4</i>     | AACGGATCCACAGCCGTA        | AGTCCTCGGGCCATGATT       |

**Supplementary Table 5. SYBR green primers.**

| Gene              | Forward                    | Reverse                    |
|-------------------|----------------------------|----------------------------|
| <i>b-actin</i>    | GGTCATCACTATTGGCAACGA      | GTCAGCAATGCCTGG            |
| <i>36b4</i>       | TCATCCAGCAGGTGTTTGACA      | GGCACCGAGGCAACAGTT         |
| <i>Gapdh</i>      | AGGCCGGTGCTGAGTATGTC       | TGCCTGCTTCACCACCTTCT       |
| <i>Mfn1</i>       | CCTACTGCTCCTTCTAACCCA      | AGGGACGCCAATCCTGTGA        |
| <i>Mfn2</i>       | AGAAGTGGACCCGGTTACCA       | CACTTCGCTGATACCCCTGA       |
| <i>Dnml1</i>      | CGTGACAAATGAAATGGTGC       | CATTAGCCACAGGCATCAG        |
| <i>Fis1</i>       | TGTCCAAGAGCACGCAATTTG      | CCTCGCACATACTTTAGAGCCTT    |
| <i>Rab5C</i>      | TGGTCCTCCGCTTTGTCAAG       | TGACCGTTGTATCGTCTAAGCA     |
| <i>Vdac1</i>      | CCCACATACGCCGATCTTGG       | GTGGTTTCCGTGTTGGCAGA       |
| <i>Bax</i>        | TGAAGACAGGGGCCCTTTTTG      | AATTCCCGGAGACACTCG         |
| <i>Ppid</i>       | AACCCGCGAGTCTTCTTTGAC      | TAATTCCGGTGAAAGGGCATC      |
| <i>Dnasella</i>   | AAGCCCTGAGCTGCTATGG        | ATACGTCAGTCCCTTTGGAGTA     |
| <i>Nlrp3</i>      | CGAGACCTCTGGGAAAAAGCT      | CATACCATAGAGGAATGTGATGTACA |
| <i>Asc</i>        | GAAGCTGCTGACAGTGCAAC       | GCCACAGCTCCAGA CTCTTC      |
| <i>S100a9</i>     | TGAGCAAGAAGGAATTCAGACAAA   | TGTGTCCAGGTCCTCCATGA       |
| <i>Rage</i>       | GAAGGCTCTGTGGGTGAGTC       | CCGCTTCTCTGACTGATTC        |
| <i>Hmgb1</i>      | CGCGGAGGAAAATCAACTAA       | TCATAACGAGCCTTGTGAGC       |
| <i>Myd88</i>      | GAAACTCCACAGGCGAGCGTA      | GTTAAGCGCGACCAAGGGTATG     |
| <i>Tnfa</i>       | CACAAGATGCTGGGACAGTGA      | TCCTTGATGGTGGTGCATGA       |
| <i>Il6</i>        | GCCCACCAAGAACGATAGTCA      | CAAGAAGGCAACTGGATGGAA      |
| <i>Il1b</i>       | GCAACTGTTCTGAACTCAACT      | ATCTTTTGGGGTCCGTCAACT      |
| <i>RelA (p65)</i> | GACCAACAATAACCCCTTTTAC     | GTTTGAGATCTGCCCTGATGG      |
| <i>Usp18</i>      | AGAGTTAGCAAGCTCCGACAT      | TGAGGTGAATGGTCAAGGTTTG     |
| <i>Ifit1</i>      | CTGAGATGTCACCTTCACATGGAA   | GTGCATCCCAATGGGTTCT        |
| <i>Irf7</i>       | CAATTCAGGGGATCCAGTTG       | AGCATTGCTGAGGCTCACTT       |
| <i>Stat1</i>      | CGCGCATGCAACTGGCATATAACT   | ATGCTTCCGTTCCACGTAAGACTT   |
| <i>Isg15</i>      | GGTGTCCGTGACTAACTCCAT      | TGGAAAGGGTAAGACCGTCCT      |
| <i>Ifnb</i>       | CCCTATGGAGATGACGGAGA       | CCCAGTGCTGGAGAAATTGT       |
| <i>Ctsl</i>       | GTGGACTGTTCTCACGCTCAAG     | TCCGTCCTTCGCTTCATAGG       |
| <i>4ebp1</i>      | CACGCTCTTCAGCACCAC         | GGAGGCTCATCGCTGGTAG        |
| <i>Fbxo32</i>     | GCAAACACTGCCACATTCTCTC     | CTTGAGGGGAAAGTGAGACG       |
| <i>Gabarapl1</i>  | CATCGTGGAGAAGGCTCTA        | ATACAGCTGGCCCATGGTAG       |
| <i>Nrf2</i>       | GCAACTCCAGAAGGAACAGG       | AGGCATCTTGTGGGAATG         |
| <i>Psm1</i>       | CATTGGAATCGTTGGTAAAGAC     | GTTTCATCGGCTTTTCTGC        |
| <i>Trim63</i>     | TGTCTGGAGGTCGTTTCCG        | ATGCCGGTCCATGATCACTT       |
| <i>Fgf21</i>      | ATGGAATGGATGAGATCTAGAGTTGG | TCTTGGTGGTCACTGTGTAGAGG    |

## Gating strategies for FACS analyses

### Mitotracker Green (ThermoFisher): Scr C2C12

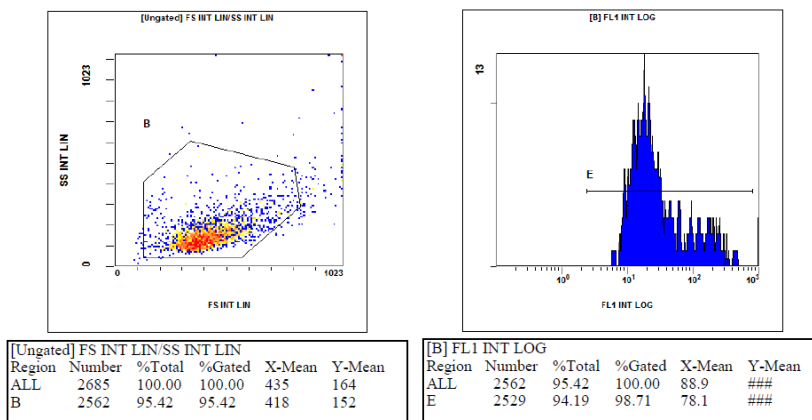

### Mitotracker Deep Red (ThermoFisher): Scr C2C12

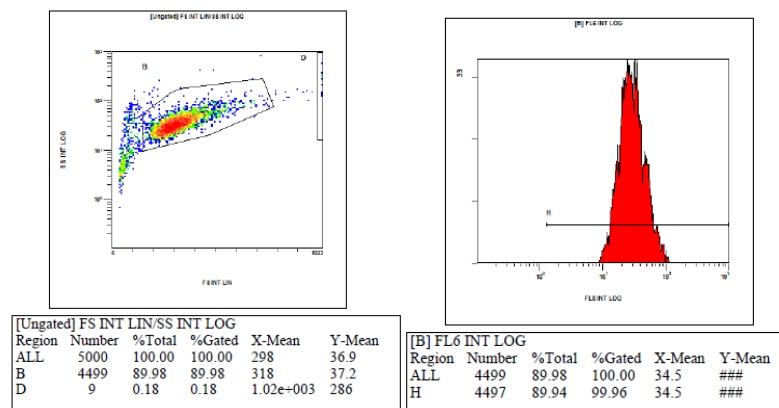

### TMRE (ThermoFisher): Scr C2C12

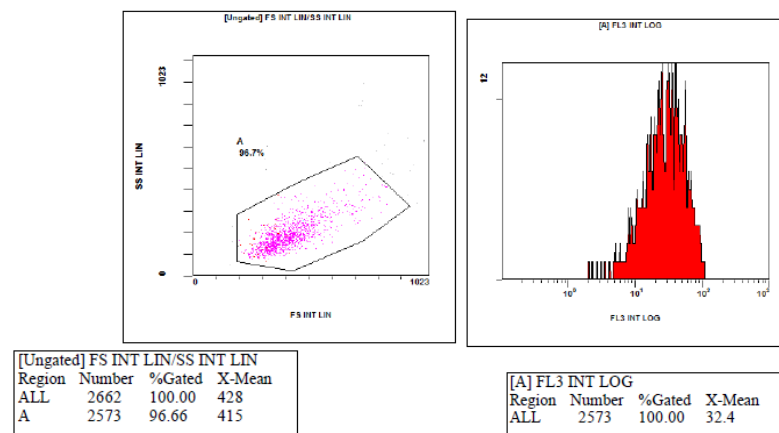

MitoSOX (ThermoFisher): Scr C2C12

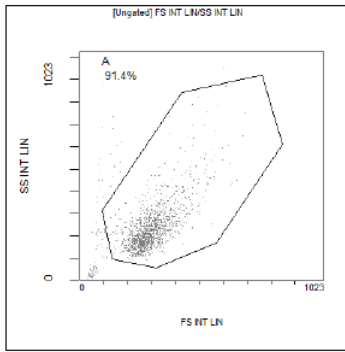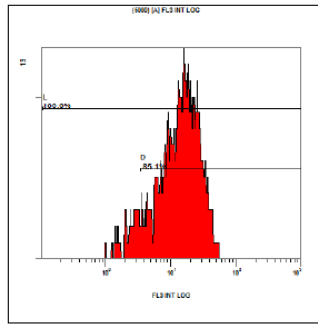

| [Ungated] FS INT LIN/SS INT LIN |        |        |        |
|---------------------------------|--------|--------|--------|
| Region                          | Number | %Gated | X-Mean |
| ALL                             | 3051   | 100.00 | 288    |
| A                               | 2788   | 91.38  | 306    |

[A  
R  
A  
H  
H

| (5000) [A] FL3 INT LOG |        |        |        |
|------------------------|--------|--------|--------|
| Region                 | Number | %Gated | X-Mean |
| ALL                    | 2788   | 100.00 | 15.8   |
| D                      | 2372   | 85.08  | 18.2   |
| L                      | 2788   | 100.00 | 15.8   |
